# Supplementary material
Source: MDPI journal article supplement (https://www.mdpi.com/2071-1050/12/15/5889)
Supplement: s1 [file s1]

## Supplementary Materials

“Environmental justice in the Netherlands: presence and quality of greenspace differ by socioeconomic status of neighbourhoods”

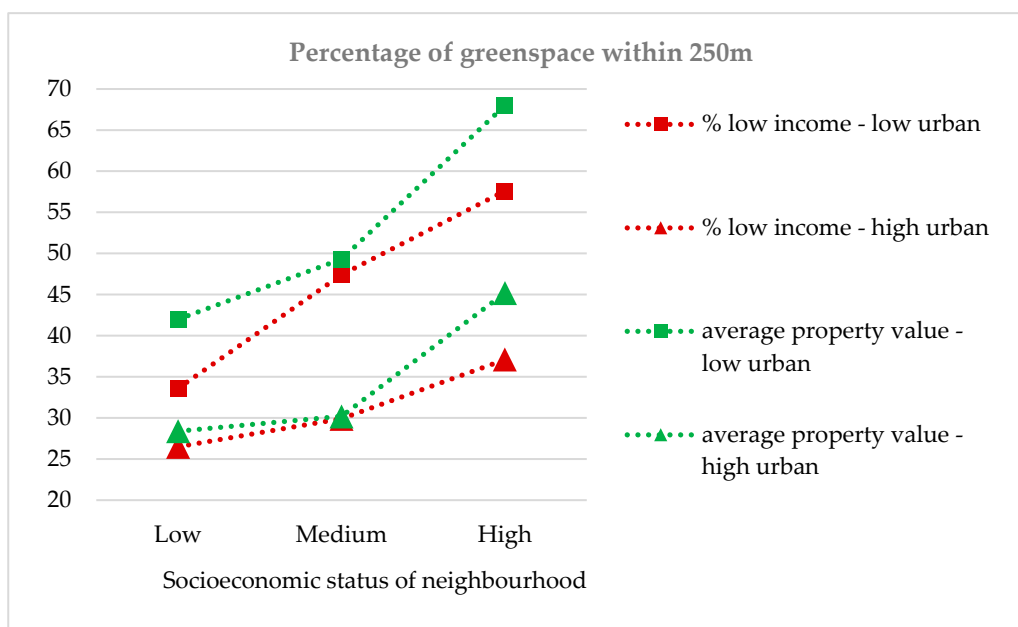

**Figure S1.** Percentage of greenspace within 250 metres per neighbourhood, by socioeconomic class and level of urbanity, with socioeconomic class based on two different characteristics: percentage of low-income households and average residential property value.

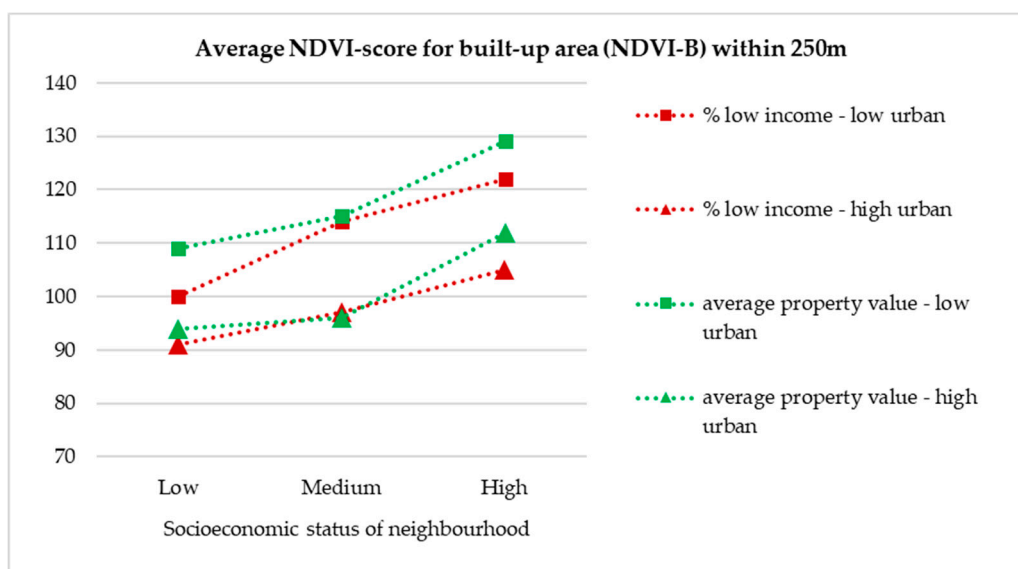

**Figure S2.** Mean NDVI-score for built-up area within 250 metres per neighbourhood, by socioeconomic class and level of urbanity, with socioeconomic class based on two different characteristics: percentage of low-income households and average residential property value.

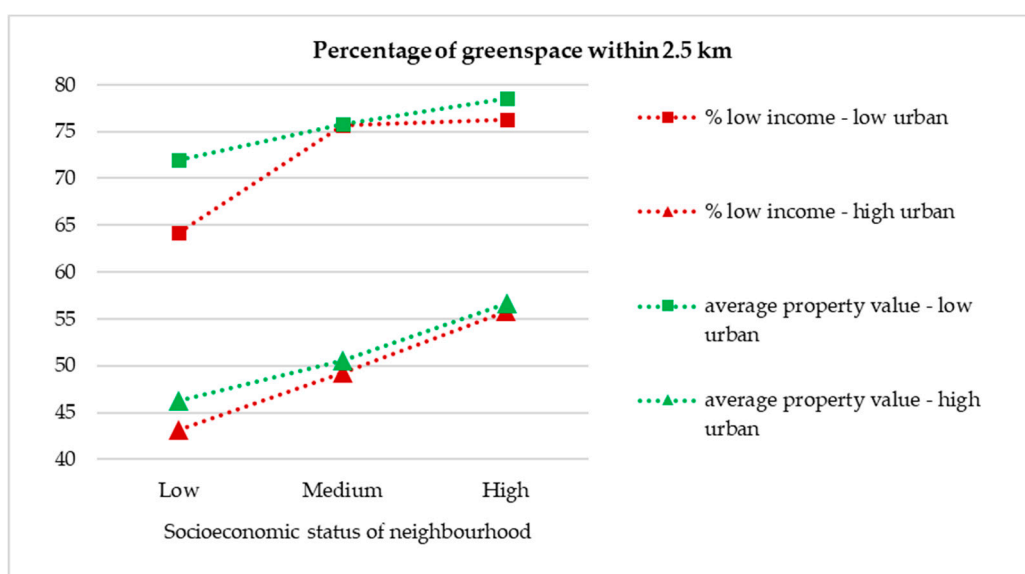

**Figure S3.** Percentage of greenspace within 2.5 kilometres per neighbourhood, by socioeconomic class and level of urbanity, with socioeconomic class based on two different characteristics: percentage of low-income households and average residential property value.

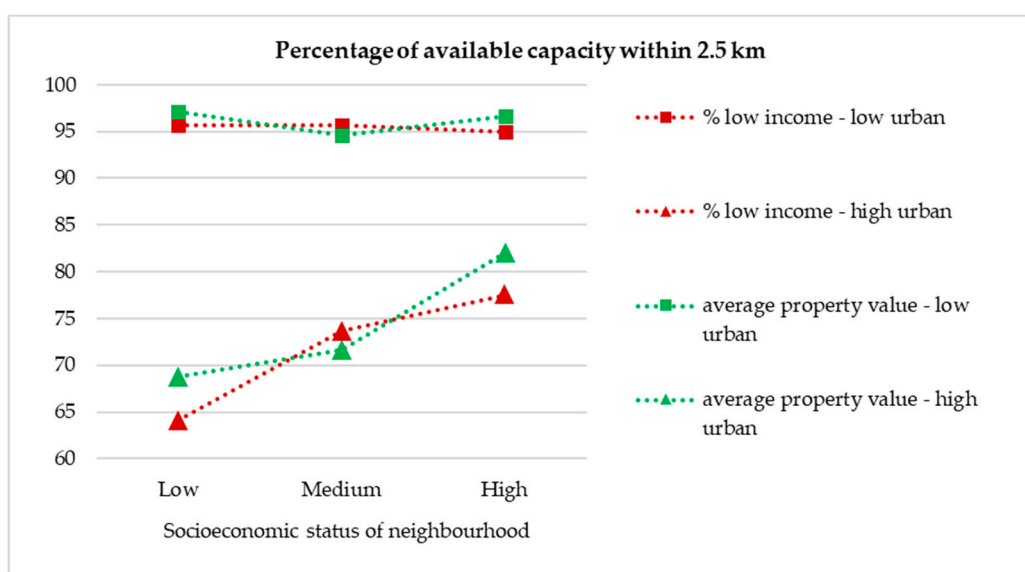

**Figure S4.** Available capacity for recreational walks in a natural environment within 2.5 kilometres (as percentage of required capacity) per neighbourhood, by socioeconomic class and level of urbanity, with socioeconomic class based on two different characteristics: percentage of low-income households and average residential property value.

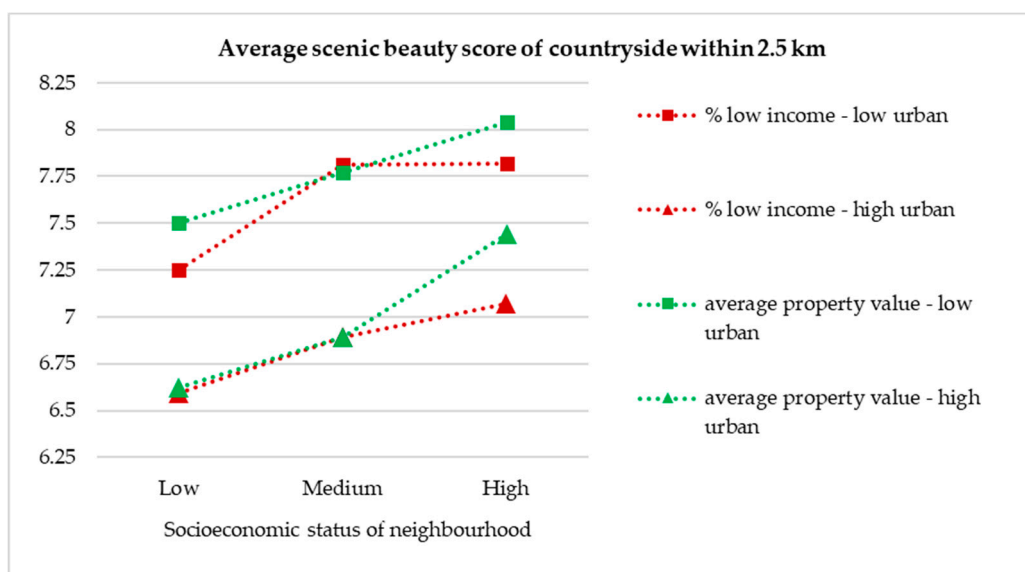

**Figure S5.** Mean (predicted) scenic beauty scores for countryside within 2.5 kilometres per neighbourhood, by socioeconomic class and level of urbanity, with socioeconomic class based on two different characteristics: percentage of low-income households and average residential property value.
